# Supplementary material for: A noncoding variant confers pancreatic differentiation defect and contributes to diabetes susceptibility by recruiting RXRA
Source: Springer Nature journal article supplement (doi:10.1038/s41467-024-54151-y), 2024-11-12
Supplement: MOESM1 [file 41467_2024_54151_MOESM1_ESM.pdf]

## Supplementary Materials for

### **A noncoding variant confers pancreatic differentiation defect and contributes to diabetes susceptibility by recruiting RXRA**

Yinglei Li<sup>1</sup>, Ran Zheng<sup>1</sup>, Lai Jiang<sup>1</sup>, Chenchao Yan<sup>1</sup>, Ran Liu<sup>1</sup>, Luyi Chen<sup>1</sup>, Wenwen Jin<sup>1</sup>, Yuanyuan Luo<sup>1</sup>, Xiafei Zhang<sup>1</sup>, Jun Tang<sup>2</sup>, Zhe Dai<sup>2</sup> and Wei Jiang<sup>1,3,4,\*</sup>

1 Department of Biological Repositories, Frontier Science Center for Immunology and Metabolism, Medical Research Institute, Zhongnan Hospital of Wuhan University, Wuhan University; Wuhan, 430071, China.

2 Department of Endocrinology, Zhongnan Hospital of Wuhan University; Wuhan, China

3 Human Genetics Resource Preservation Center of Wuhan University; China.

4 Hubei Provincial Key Laboratory of Developmentally Originated Disease; China.

\*Corresponding author. Email: [jiangw.mri@whu.edu.cn](mailto:jiangw.mri@whu.edu.cn)

## **Supplementary Figures**

**Supplementary Figure 1: Editing to obtain PSCs with rs6048205 variants.**

**Supplementary Figure 2: PSCs with rs6048205-G formed DE and PDX1+ PP1 cells normally.**

**Supplementary Figure 3: rs6048205-G affected pancreatic progenitor differentiation.**

**Supplementary Figure 4: rs6048205-G had minimal effect on cell apoptosis.**

**Supplementary Figure 5: FOXA2 overexpression in PP stage affected pancreatic development *in vitro*.**

**Supplementary Figure 6: rs6048205-G enhanced RXRA binding.**

**Supplementary Figure 7: The function of rs6048205-G in the mouse model.**

**Supplementary Figure 8: Representative flow cytometry plots and gating strategy.**

## **Supplementary Tables**

**Supplementary Table 1. Primers for RT-qPCR analyses.**

**Supplementary Table 2. Primers for ChIP-qPCR analyses.**

**Supplementary Table 3. Sequence of EMSA probes.**

Supplementary Figure 1

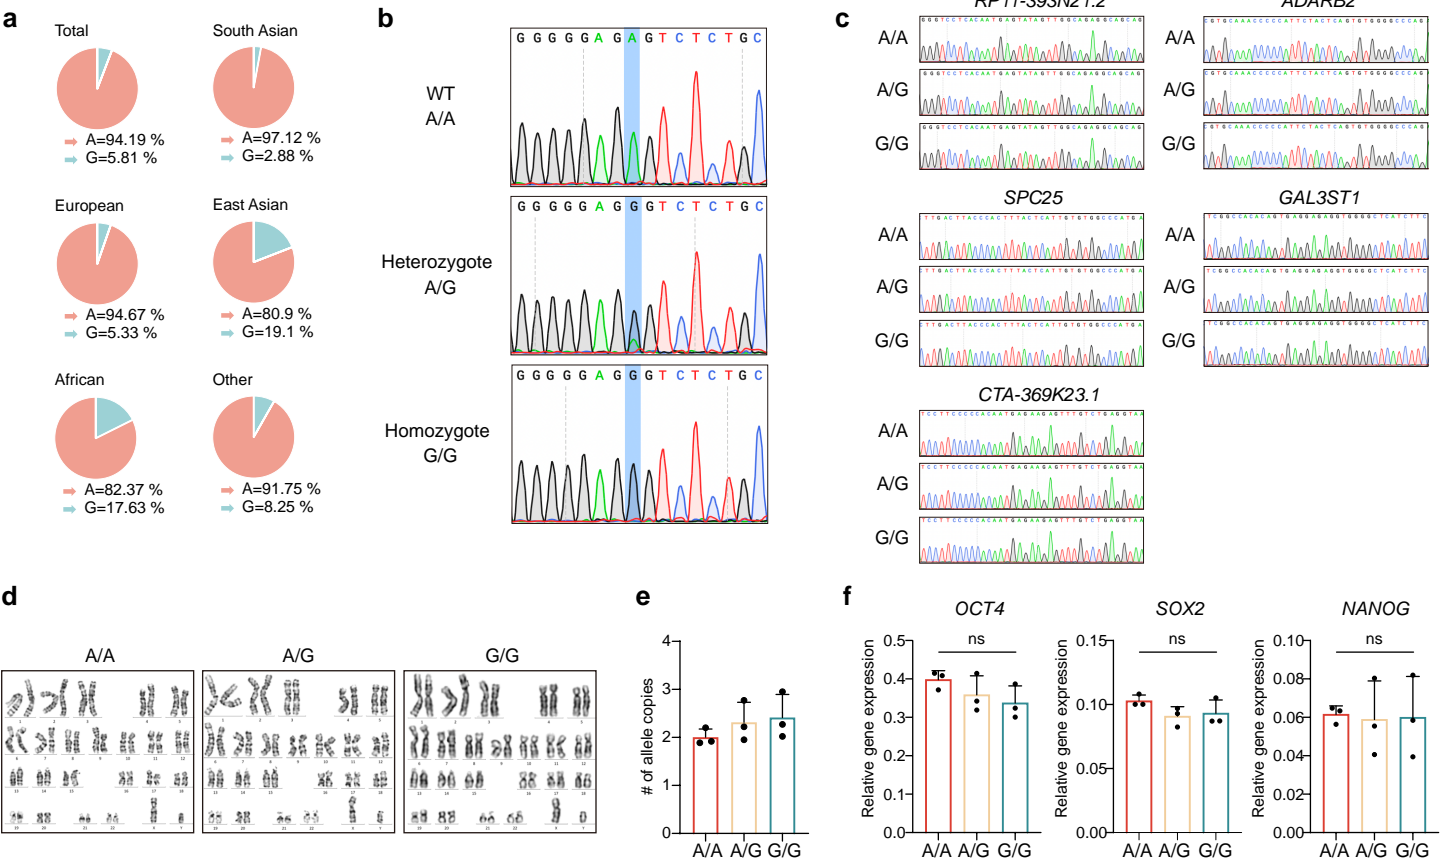

**Supplementary Figure 1: Editing to obtain PSCs with rs6048205 variants.**

**a** Allelic frequency of rs6048205 in different populations from ALFA (Allele Frequency Aggregator). **b** Sanger sequencing reads of SNP rs6048205 in CRISPR/Cas9-edited PSCs. **c** PCR amplification and Sanger sequencing of about 500 bp surrounding potential off-target regions revealed no sequence deviation in these regions in the edited PSCs. Potential off-target regions were obtained by the CCTop CRISPR/Cas9 off-target online predictor. **d** G-band karyotype analysis of edited PSCs. **e** qPCR assay assessed allele copy numbers in edited PSCs ( $n = 3$  independent experiments). **f** mRNA expression levels of pluripotency markers (*OCT4*, *SOX2* and *NANOG*) of edited iPSCs quantified by RT-qPCR ( $n = 3$  independent experiments). Data are presented as the mean  $\pm$  SD. Statistical significance was determined using the unpaired, two-tailed *t*-test in **f** (ns not significant).

Supplementary Figure 2

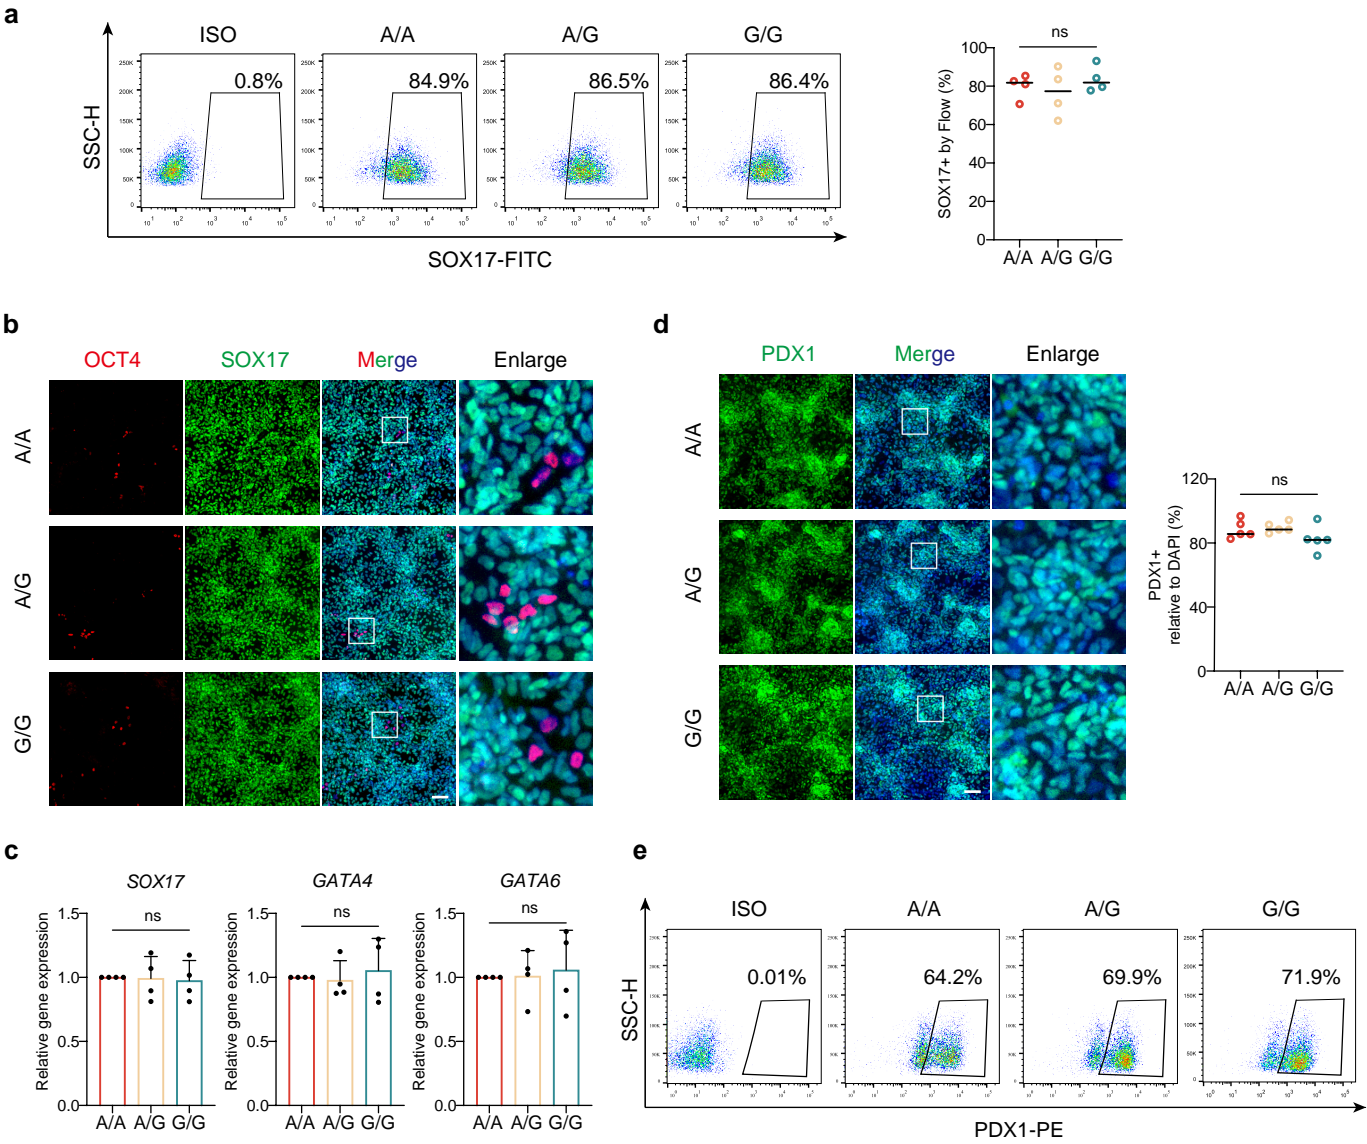

**Supplementary Figure 2: PSCs with rs6048205-G formed DE and PDX1+ PP1 cells normally.**

**a** Flow cytometry analysis of SOX17 in DE stage and statistical results ( $n = 4$  independent experiments). **b** Immunofluorescence staining of DE cells with DE marker (SOX17) and pluripotent marker (OCT4). Scale bar, 100  $\mu\text{m}$ . **c** mRNA expression levels of DE markers (*SOX17*, *GATA4* and *GATA6*) quantified by RT-qPCR ( $n = 4$  independent experiments). Gene expression levels were normalized to *GAPDH* and then further normalized to the A/A group. **d** Immunofluorescence staining of PP1 cells with PDX1 and statistical analysis ( $n = 5$  images). Scale bar, 100  $\mu\text{m}$ . **e** Flow cytometry analysis of PDX1 in PP1 stage ( $n = 3$  independent experiments). Data are presented as the mean  $\pm$  SD. Statistical significance was determined using the unpaired, two-tailed *t*-test in **a**, **c**, **d** (ns not significant).

Supplementary Figure 3

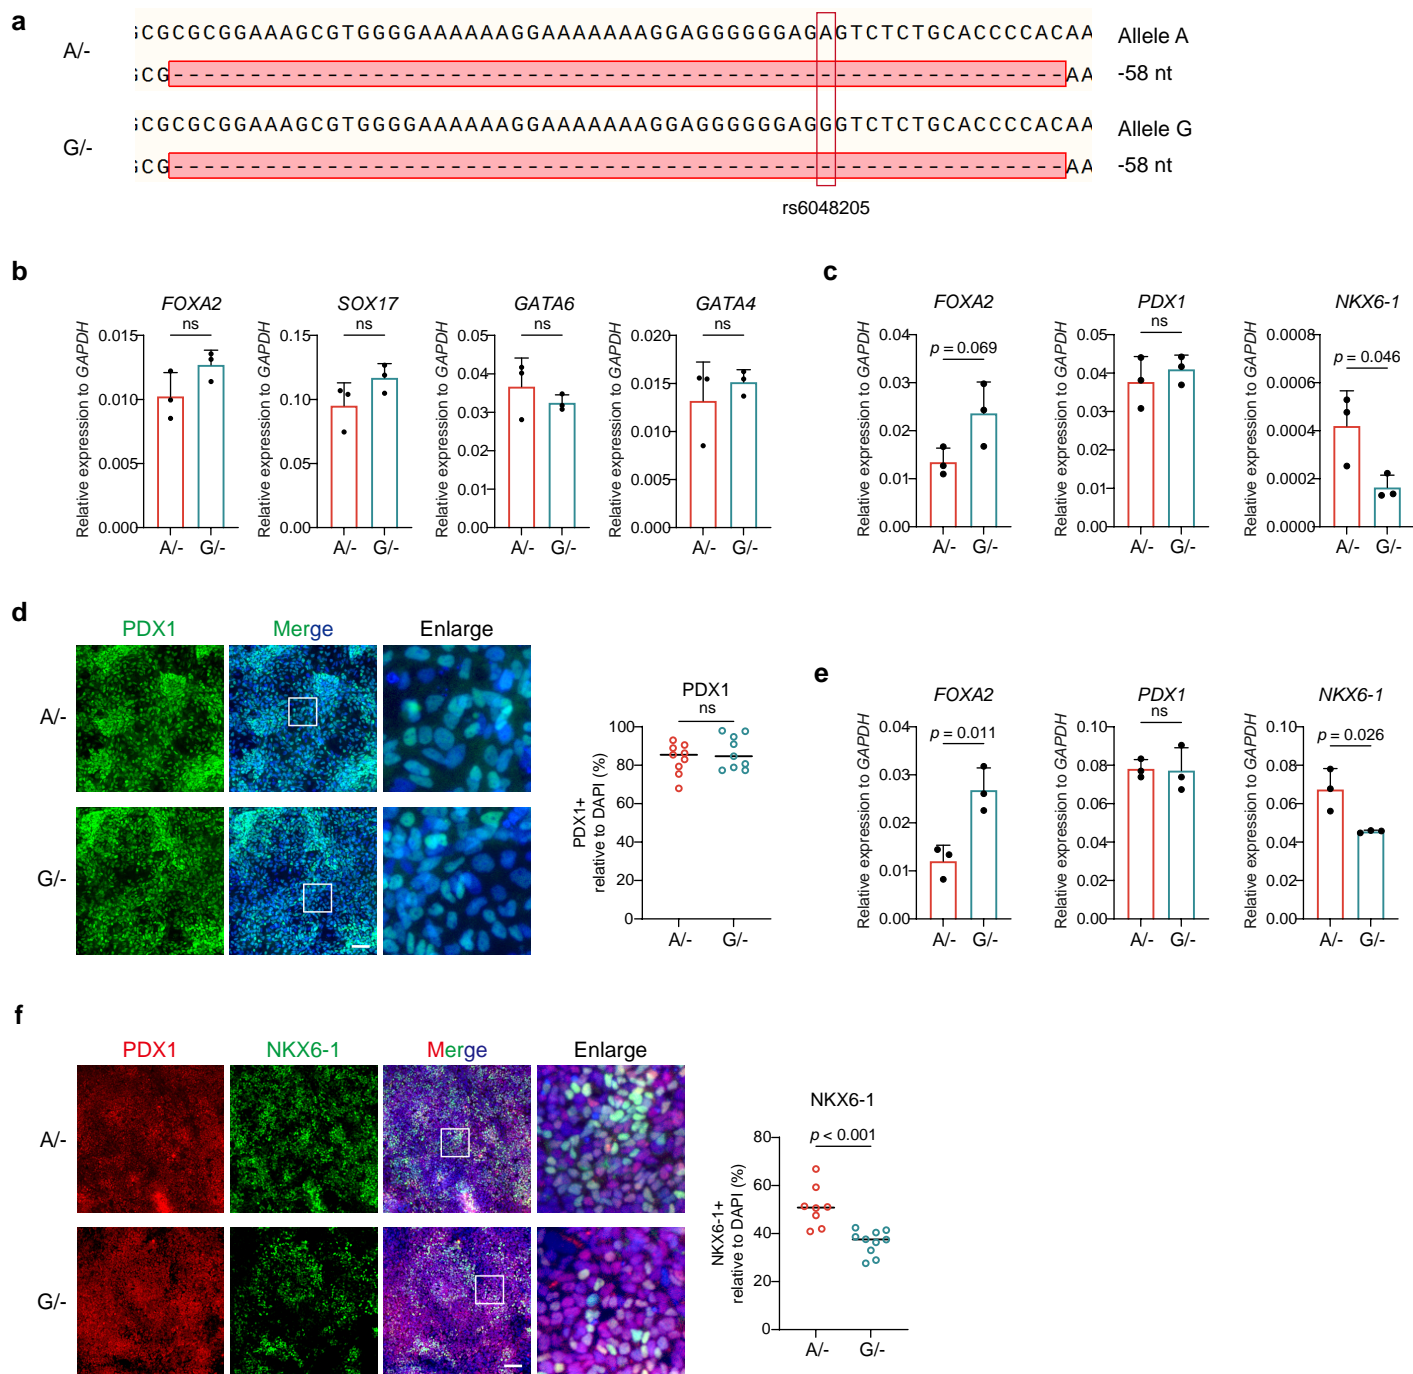

**Supplementary Figure 3: rs6048205-G affected pancreatic progenitor cell differentiation.**

**a** Genotyping of A/- and G/- cells obtained from HUES8. Each cell has a 58 nt deletion containing SNP rs6048205 on one allele. **b** mRNA expression levels of DE markers (*SOX17*, *GATA4* and *GATA6*) quantified by RT-qPCR ( $n = 3$  independent experiments). **c** mRNA expression levels of *FOXA2* and PP1 markers (*PDX1* and *NKX6-1*) quantified by RT-qPCR ( $n = 3$  independent experiments). **d** Immunofluorescence staining of PP1 cells with PDX1 and statistical analysis ( $n = 9$  images). Scale bar, 100  $\mu\text{m}$ . **e** mRNA expression levels of *FOXA2* and PP2 markers (*PDX1* and *NKX6-1*) quantified by RT-qPCR ( $n = 3$  independent experiments). **f** Representative immunofluorescence images of PP2 cells stained by PDX1 (red) and NKX6-1 (green) and quantitative analysis for the percentage of NKX6-1-positive cells ( $n = 9$  images). Nuclei were counterstained with DAPI (blue). Scale bar, 100  $\mu\text{m}$ . Data are presented as the mean  $\pm$  SD. Statistical significance was determined using the unpaired, two-tailed  $t$ -test in **b-f** (ns not significant).

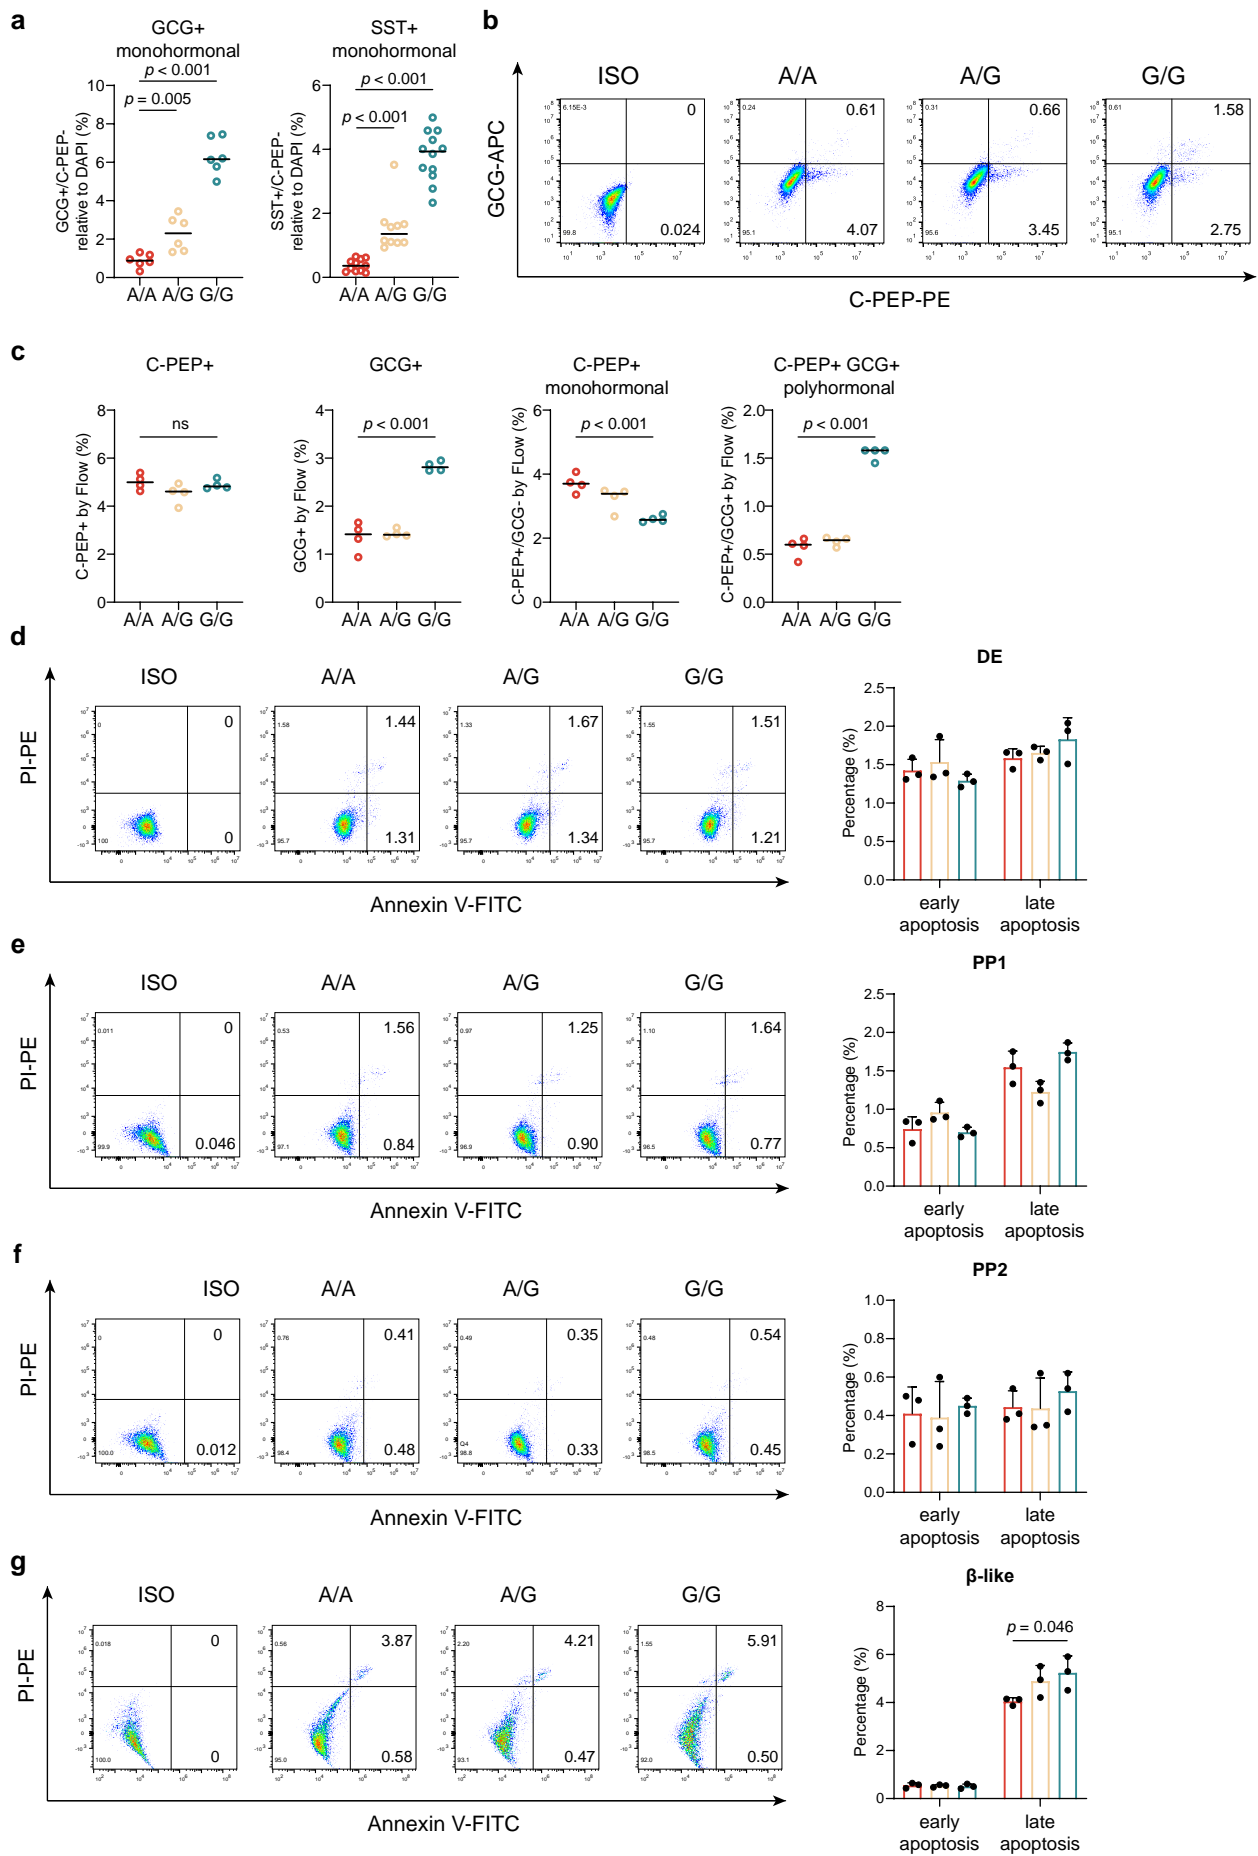

**Supplementary Figure 4: rs6048205-G had minimal effect on cell apoptosis.**

**a** Quantitative analysis for the percentage of GCG ( $n = 6$  images) and SST ( $n = 11$  images in A/A,  $n = 10$  in A/G and  $n = 12$  in G/G) monohormonal cells in Fig.2**d-e**. **b-c** Flow cytometry analysis of C-PEP and GCG in  $\beta$ -like cell stage (**b**) and statistical results (**c**) for the percentage of C-PEP<sup>+</sup>, GCG<sup>+</sup>, C-PEP<sup>+</sup> monohormonal cells and C-PEP<sup>+</sup>/GCG<sup>+</sup> polyhormonal cells ( $n = 4$  independent experiments). **d-g** Apoptosis assay with PI and Annexin V double staining detected by FACS in DE (**d**), PP1(**e**), PP2(**f**), and  $\beta$ -like cell (**g**) stage, the statistical results are shown right. Early apoptosis was defined as Annexin V positive, and late apoptosis was defined as PI- and Annexin V-double positive ( $n = 3$  independent experiments). Data are presented as the mean  $\pm$  SD. Statistical significance was determined using the unpaired, two-tailed  $t$ -test in **a**, **c-g** (ns not significant).

Supplementary Figure 5

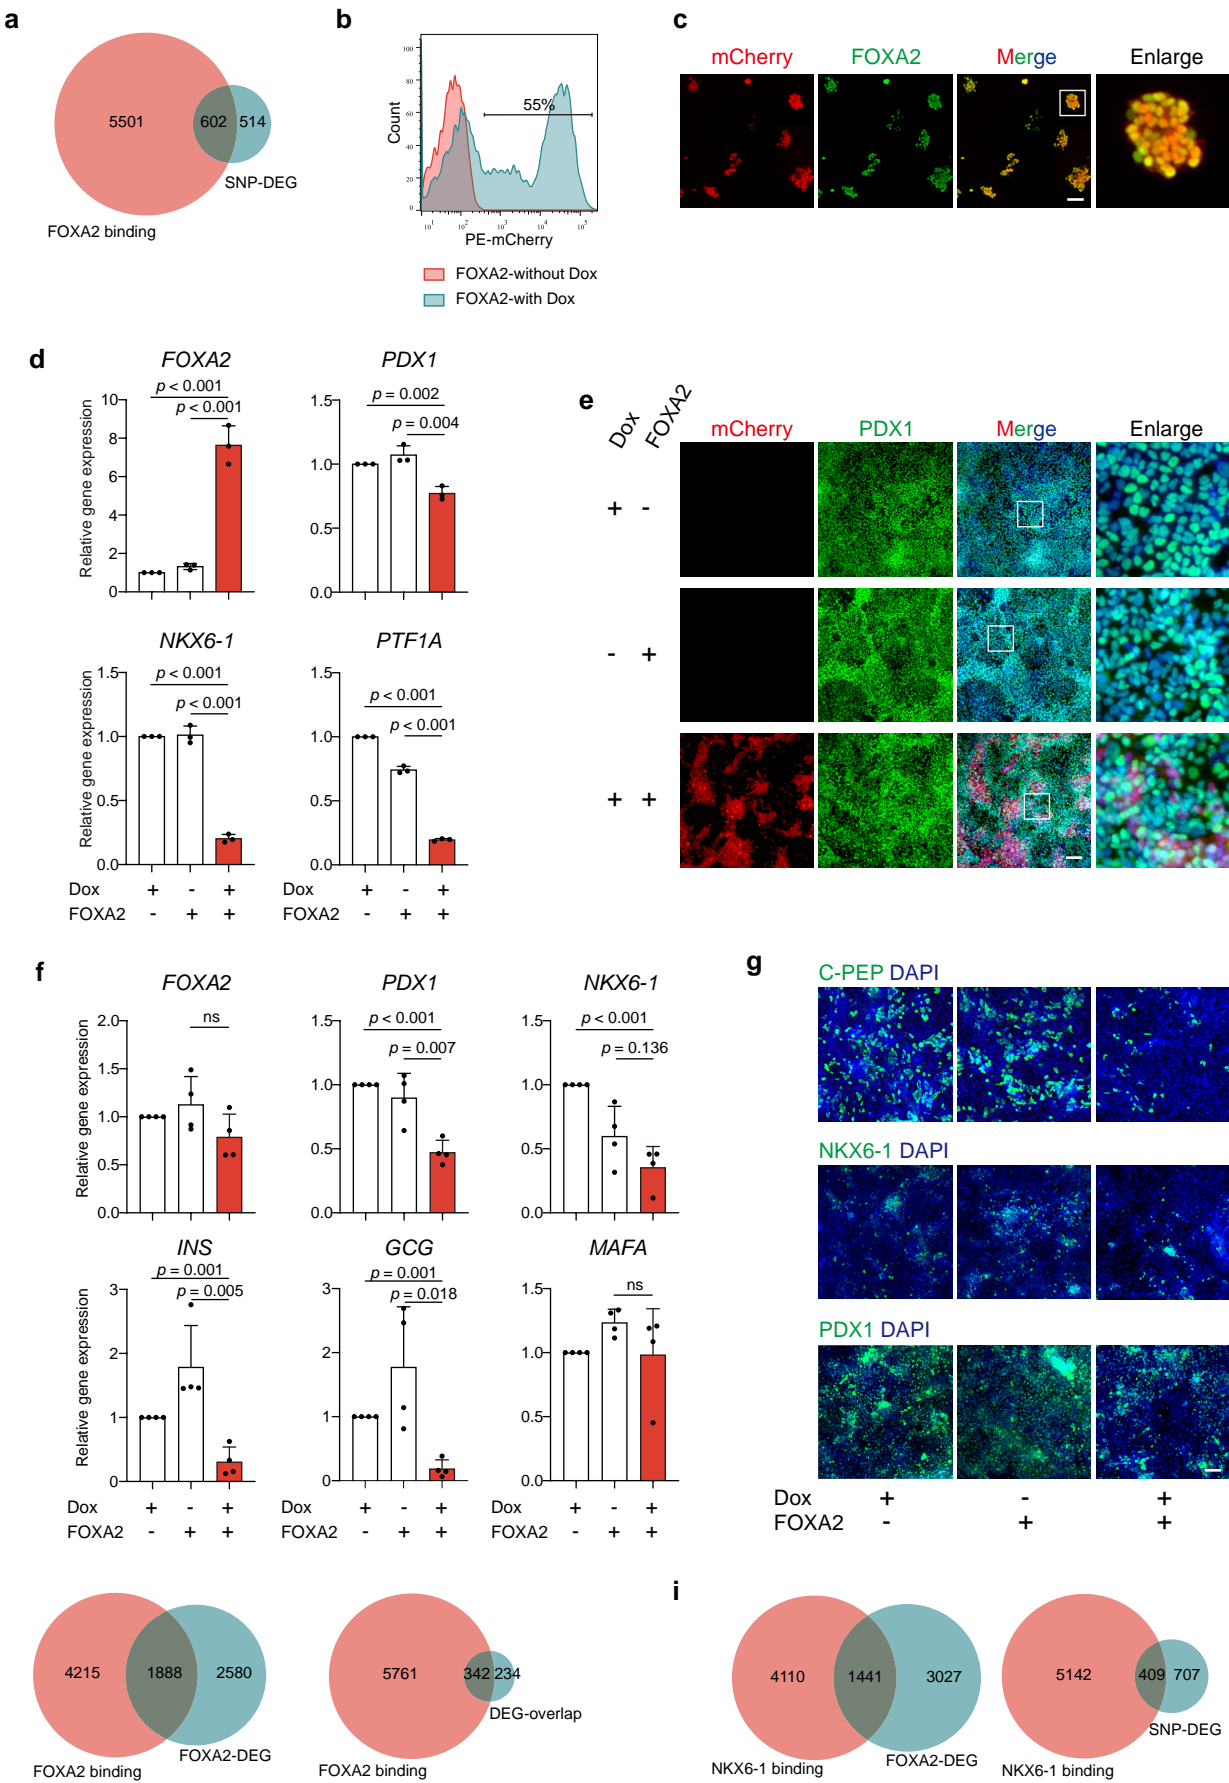

**Supplementary Figure 5: FOXA2 overexpression in PP stage affected pancreatic development *in vitro*.**

**a** Venn diagram showing differentially expressed genes (DEGs) overlap in SNP-G mutation and FOXA2 binding targets. **b** mCherry expression of inducible FOXA2 overexpressed ESCs with or without Dox quantified by flow cytometry. **c** Immunofluorescence staining of inducible FOXA2 overexpressed ESCs with FOXA2 and mCherry after 2 days of Dox treatment. Scale bar, 100  $\mu\text{m}$ . **d** mRNA levels of *FOXA2* and PP2 markers (*PDX1*, *NKX6-1* and *PTF1A*) detected by RT-qPCR in PP2 stage ( $n = 3$  independent experiments). Gene expression levels were normalized to *GAPDH* and then further normalized to the control group. **e** Immunofluorescence of PP2 cells stained by PDX1 (green), nuclei were counterstained with DAPI. Scale bar, 100  $\mu\text{m}$ . **f** mRNA expression levels of  $\beta$  cell markers quantified by RT-qPCR ( $n = 4$  independent experiments). Gene expression levels were normalized to *GAPDH* and then further normalized to the control group. **g** Immunofluorescence of  $\beta$  cells stained by PDX1, NKX6-1, and C-PEP; nuclei were counterstained with DAPI. Scale bar, 100  $\mu\text{m}$ . **h** Left: Venn diagram showing the overlap of differentially expressed genes (DEGs) in FOXA2 overexpress and FOXA2 targets; right: Venn diagram showing the overlap of differentially expressed genes (DEGs) in SNP-G and FOXA2 targets. **i** Left: Venn diagram showing the overlap of differentially expressed genes (DEGs) in FOXA2 overexpress and NKX6-1 binding genes; right: Venn diagram showing the overlap of differentially expressed genes (DEGs) in SNP risk allele G group and NKX6-1 binding genes. Data are presented as the mean  $\pm$  SD. Statistical significance was determined using the unpaired, two-tailed *t*-test in **d**, **e** (ns not significant).

Supplementary Figure 6

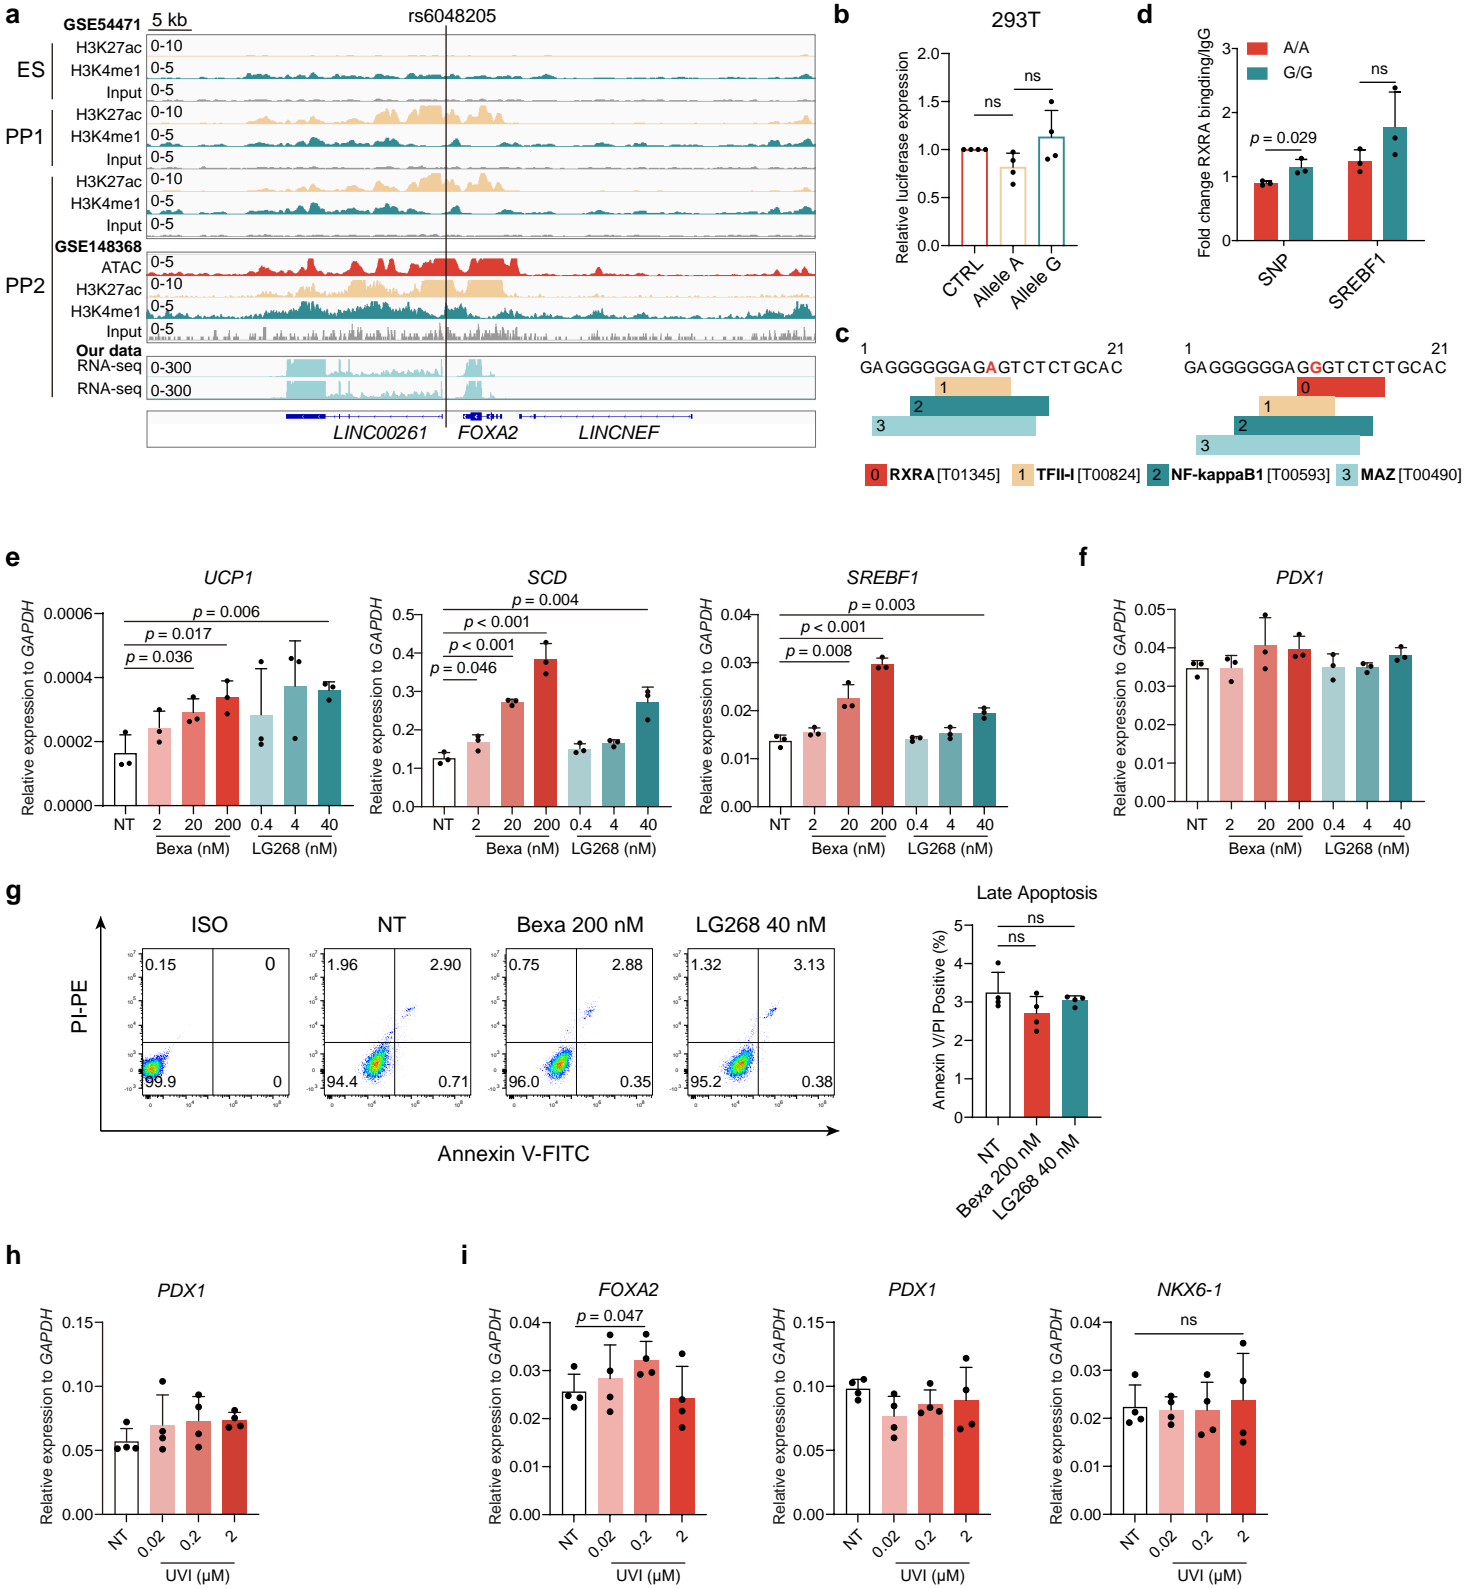

**Supplementary Figure 6: rs6048205-G enhanced RXRA binding.**

**a** Bedgraph for H3K27ac and H3K4me1 ChIP-seq, ATAC-seq and RNA-seq data at SNP rs6048205 loci. The x-axis corresponds to genomic locations with the scale at the panel's top. The y-axis corresponds to signal intensity. **b** Firefly luciferase/Renilla luciferase activity for different rs6048205 alleles in 293T cells ( $n = 4$  independent experiments). **c** Motif prediction of sequence around rs6048205 performed using PROMO. **d** ChIP-qPCR for RXRA normalized to IgG control at rs6048205 using PP cells differentiated from the A/A and G/G cell lines ( $n = 3$  independent experiments). **e** mRNA levels of RXRA downstream genes *UCP1*, *SCD*, and *SREBF1* in PP2 cells treated with different dosages of RXR agonists bexarotene (Bexa) and LG000268 (LG268) detected by RT-qPCR analysis ( $n = 3$  independent experiments). **f** mRNA levels of *PDX1* in PP2 cells treated with different dosages of RXR agonists by RT-qPCR analysis ( $n = 3$  independent experiments). **g** Apoptosis assay with PI and Annexin V double staining detected by FACS in PP2 cells treated with the highest dosage of RXR agonists. The statistical results are right: early apoptosis was defined as Annexin V positive, and late apoptosis was defined as PI and Annexin V double positive ( $n = 3$  independent experiments). **h** mRNA levels of *PDX1* in G/G PP2 cells treated with different dosages of RXR inhibitor UVI3003 (UVI) by RT-qPCR analysis ( $n = 4$  independent experiments). **i** mRNA levels of *FOXA2*, *PDX1* and *NKX6-1* in A/A PP2 cells treated with different dosages of RXR inhibitor UVI3003 (UVI) by RT-qPCR analysis ( $n = 4$  independent experiments). Data are presented as the mean  $\pm$  SD. Statistical significance was determined using the unpaired, two-tailed *t*-test in **b**, **d**, **e-i** (ns not significant).

Supplementary Figure 7

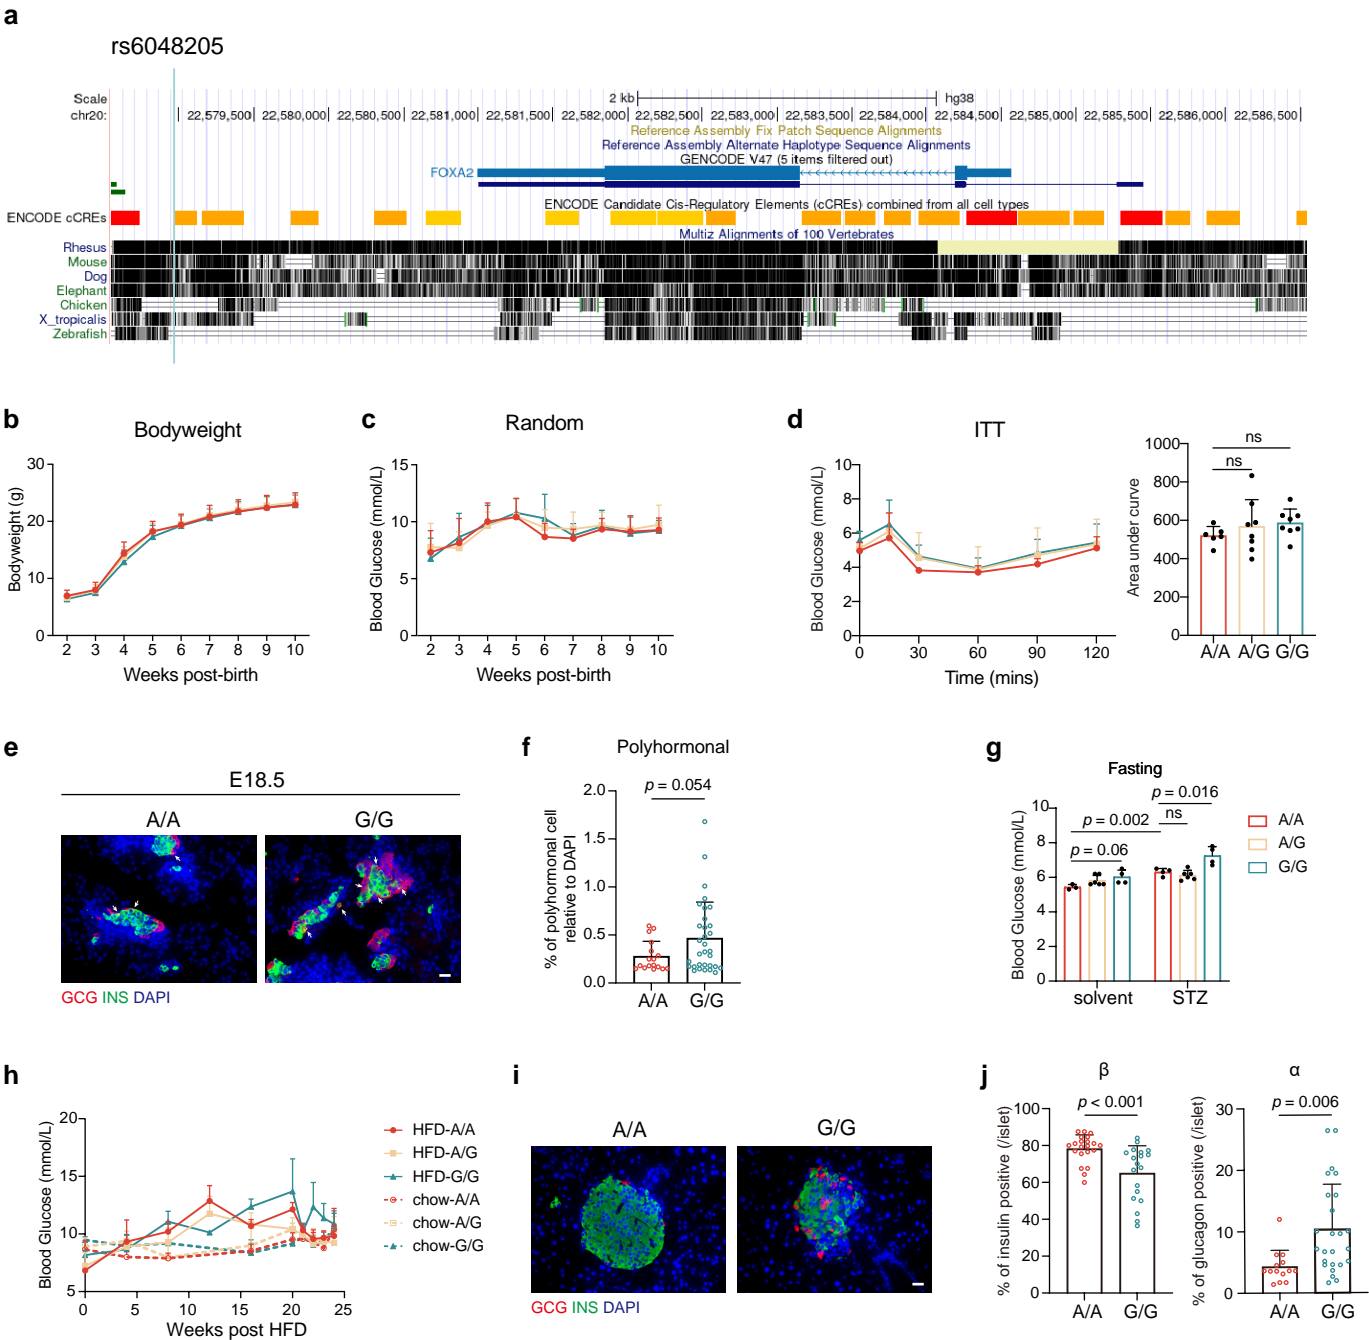

**Supplementary Figure 7: The function of rs6048205 in the mouse model.**

**a** Conservation analysis downloaded from UCSC. The SNP rs6048205 was marked by a blue line. **b** Body weight of each genotype over time post birth ( $n = 18$  mice in A/A,  $n = 31$  A/G and  $n = 16$  in G/G). **c** Quantification of the blood glucose of each genotype over time ( $n = 18$  mice in A/A,  $n = 31$  in A/G and  $n = 16$  in G/G). **d** Insulin tolerance tests (ITT) were performed in fasting 6 hours. The area under the curve (AUC) for each ITT was shown on the right ( $n = 6$  mice in A/A,  $n = 8$  in A/G and G/G). **e-f** Representative immunofluorescence staining of E18.5 pancreas with INS and GCG (**e**) and statistical analysis (**f**) of INS+/GCG+ polyhormonal cells percentage in each field under the microscope ( $n = 17$  in A/A and  $n = 32$  in G/G). The arrows indicate the polyhormonal cells. Scale bar, 20  $\mu\text{m}$ . **g** Fasting blood glucose levels of each group after STZ injection ( $n = 4$  mice in STZ A/A, STZ G/G and solvent G/G,  $n = 6$  in STZ A/G and solvent A/G,  $n = 3$  in solvent A/A,  $n = 6$  in solvent A/G). **h** Quantification of the random blood glucose of each genotype after HFD ( $n = 3$  mice). **i-j** Representative immunofluorescence staining of adult mice islets with Insulin (INS) and Glucagon (GCG) (**i**) and statistical analysis (**j**) of  $\beta$  cells and  $\alpha$  cells percentage in HFD mice of each genotype ( $n = 22$  in A/A,  $n = 19$  in G/G). Scale bar, 20  $\mu\text{m}$ . Data are presented as the mean  $\pm$  SD. Statistical significance was determined using the unpaired, two-tailed  $t$ -test in **d**, **f**, **g**, **j** (ns not significant).

Supplementary Figure 8

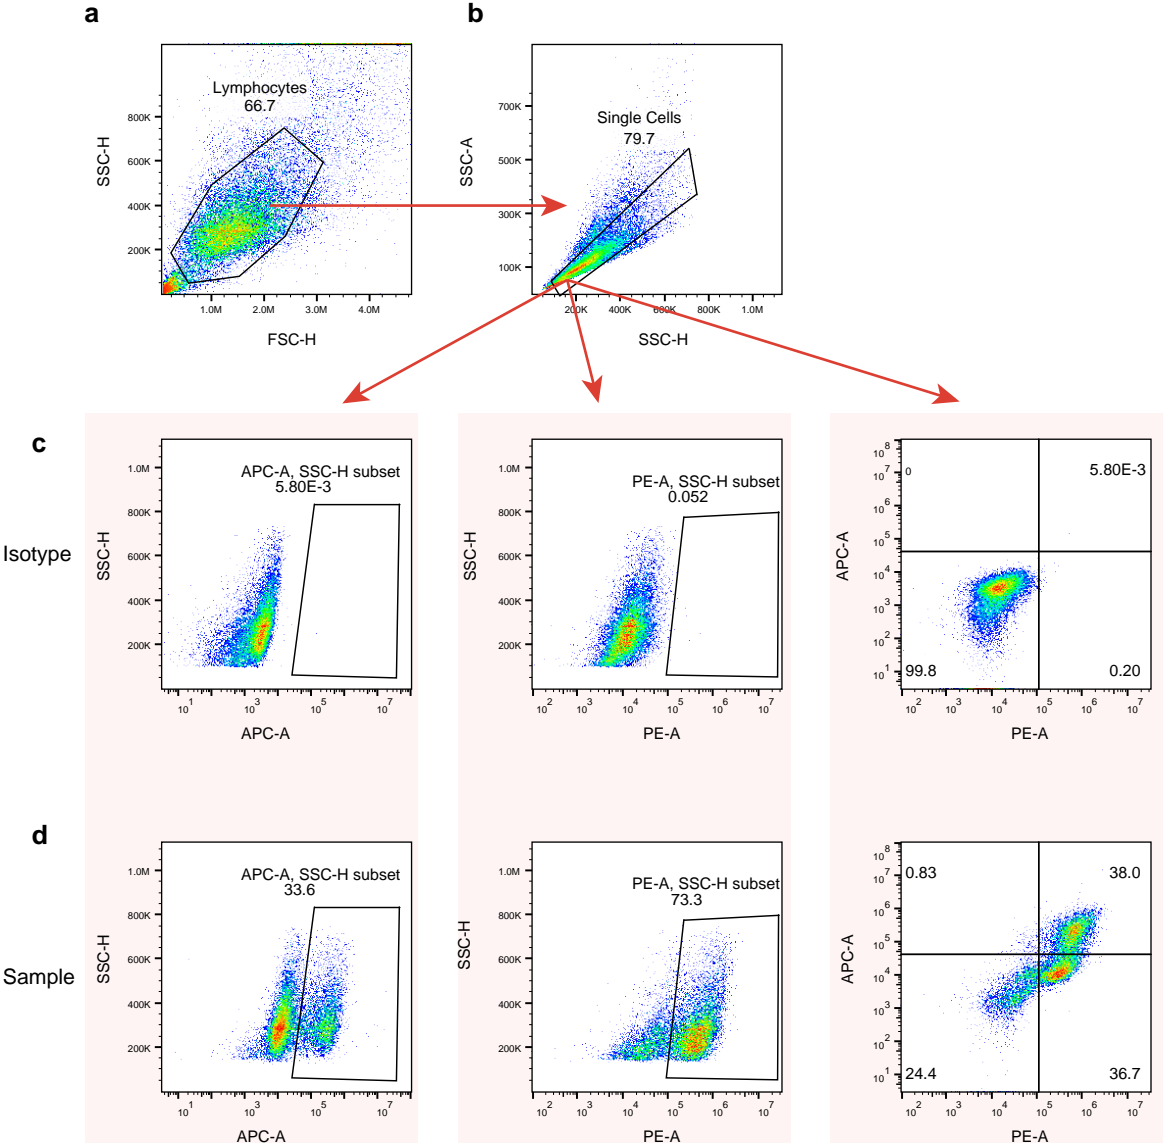

**Supplementary Figure 8: Representative flow cytometry plots and gating strategy.**

**a** A cell population was selected based on size (FSC-H) and granularity (SSC-H) to exclude cell debris. **b** Doublets and multiplets were excluded from the population using side scatter area (SSC-A) and side scatter height (SSC-H), resulting in a population of single cells. **c-d** The single cells were then analyzed using APC-A and PE-A, with populations positive for either marker or both visualized on a two-parameter density plot of PE-A versus APC-A. Based on this plot, a gate was set for the isotype control, showing cells negative for PE-A and APC-A (**c**).

**Supplementary Table 1: Primers for qRT-PCR analyses**

| <b>Primer name</b> | <b>Forward primer</b>     | <b>Reverse primer</b>   |
|--------------------|---------------------------|-------------------------|
| <i>GAPDH</i>       | AATGAAGGGGTCATTGATGG      | AAGGTGAAGGTCGGAGTCAA    |
| <i>OCT4</i>        | CAAAGCAGAAACCCTCGTGC      | TCTCACTCGGTTCTCGATACTG  |
| <i>SOX2</i>        | GTCATTTGCTGTGGGTGATG      | AGAAAAACGAGGGAAATGGG    |
| <i>NANOG</i>       | CCCCAGCCTTTACTCTTCCTA     | CCAGGTTGAATTGTTCCAGGTC  |
| <i>SOX17</i>       | GCATGACTCCGGTGTGAATCT     | TCACACGTCAGGATAGTTGCAGT |
| <i>FOXA2</i>       | GGAGCAGCTACTATGCAGAGC     | CGTGTTTCATGCCGTTTCATCC  |
| <i>GATA4</i>       | CAGGCGTTGCACAGATAGTG      | CCCGACACCCCAATCTC       |
| <i>GATA6</i>       | AGTTCCTACGCTTCGCATCCCTTC  | TGAACAGCAGCAAGTCCTCCCA  |
| <i>PDX1</i>        | TTAGGATGTGGACGTAATTCCTGTT | GGCCACTGTGCTTGTCTTCA    |
| <i>INS</i>         | GCAGCCTTTGTGAACCAACAC     | CCCCGCACACTAGGTAGAGA    |
| <i>GCG</i>         | CTGAAGGGACCTTTACCAGTGA    | CCTGGCGGCAAGATTATCAAG   |
| <i>SST</i>         | CCCAGACTCCGTCAGTTTCT      | ATCATTCTCCGTCTGGTTGG    |
| <i>NKX6-1</i>      | AGACCCACTTTTTCCGGACA      | CCAACGAATAGGCCAAACGA    |
| <i>PTF1A</i>       | CAGGACACTCTCTCTCATGGA     | TGGTGGTTCGTTTTCTATGTTGT |
| <i>RXRA</i>        | ACAAGACGGAGCTGGGCTG       | GGCTGCTCTGGGTACTTGTGC   |
| <i>UCP1</i>        | CTTCAGCGGCAAATCAGCTC      | TCTTGCTTCCTAAACTAGGTGCT |
| <i>SREBF1</i>      | CCTTGCATTTTCTGACACGCT     | CAAGCTGTACAGGCTCTCCC    |
| <i>SCD</i>         | TGCGATATGCTGTGGTGCTT      | TTGTGGAAGCCCTCACCCAC    |

**Supplementary Table 2: Primers for ChIP-qPCR analyses**

| Primer name   | Forward primer       | Reverse primer        |
|---------------|----------------------|-----------------------|
| Allele A      | CATGGTTGCTTAAACCGGCG | CATTGTGGGGTGCAGAGACT  |
| Allele G      | CATGGTTGCTTAAACCGGCG | CATTGTGGGGTGCAGAGACC  |
| <i>SREBF1</i> | GGTTGGGGTTACTAGCGGAC | GTGTTGGGCCAGGACTTCTC  |
| <i>FOXA2</i>  | TGCCCACAGCATTTCGTAAC | GCCCCATCATTGATTCCTGG  |
| peak1         | CCTGTCCTCTGGCCAAACTG | AGGGGTAGGGAGTGATGCAA  |
| peak2         | GTCTCTGGCCGCATCTTGTG | AACTGGTGCTTCCCATGAAGA |

**Supplementary Table 3: Sequence of EMSA probes.**

| Probe name | Forward                                                | Reverse                                           |
|------------|--------------------------------------------------------|---------------------------------------------------|
| Allele-A   | GGAAAAAAAGGAGGGGGGA<br>GAGTCTCTGCACCCCACAAT-<br>biotin | ATTGTGGGGTGCAGAGACTCTC<br>CCCCCTCCTTTTTTCC-biotin |
| Allele-G   | GGAAAAAAAGGAGGGGGGA<br>GGGTCTCTGCACCCCACAAT-<br>biotin | ATTGTGGGGTGCAGAGACCCTC<br>CCCCCTCCTTTTTTCC-biotin |
